1                               **Emotional Metacognition:**  
2                               **Stimulus Valence Modulates Cardiac Arousal and Metamemory**

3  
4       Nicolas Legrand<sup>1\*</sup>, Sebastian Scott Engen<sup>1\*</sup>, Camile Correa<sup>1</sup>, Nanna Kildahl Mathiasen<sup>1</sup>,  
5                               Niia Nikolova<sup>1</sup>, Francesca Fardo<sup>1,2</sup>, Micah Allen<sup>1,3,4</sup>

6       <sup>1</sup> Center of Functionally Integrative Neuroscience, Aarhus University Hospital, Denmark  
7       <sup>2</sup> Danish Pain Research Centre, Aarhus University Hospital, Denmark  
8       <sup>3</sup> Aarhus Institute of Advanced Studies, Aarhus University, Denmark  
9       <sup>4</sup> Cambridge Psychiatry, University of Cambridge, Cambridge, UK

10  
11       \* Equal contribution.

12       **Corresponding author:** [nicolas.legrand@cfm.au.dk](mailto:nicolas.legrand@cfm.au.dk)

13       **Keywords:** *emotion, arousal, heart rate variability, metacognition, memory*

14       **Abstract**

15       Emotion alters how we feel, see, and experience the world. In the domain of memory, the  
16       emotional valence and arousal of memorized stimuli can modulate both the acuity and content  
17       of episodic recall. However, no experiment has investigated whether arousal and valence also  
18       influence metacognition for memory (i.e., the process of self-monitoring memories). In a pre-  
19       registered study, we applied a novel psychophysiological design together with computational  
20       models of metacognition to assess the influence of stimulus valence and arousal on the  
21       sensitivity, bias, and efficiency of metamemory. To estimate the role of physiological arousal  
22       in mediating these effects, we recorded cardiac measures through pulse oximetry. We found  
23       that negative valence globally and substantially decreased both memory performance and  
24       subjective confidence, in particular for low-arousal words. Simultaneously, we found that  
25       emotional valence modulated both heart rate and heart-rate variability (HRV), indicating a  
26       robust effect of negative valence on physiological arousal during recognition memory.  
27       Exploratory trial-level analyses further revealed that subjective confidence was encoded in  
28       instantaneous heart-rate fluctuations, and that this relationship was modulated by emotional  
29       valence. Our results demonstrate that both recognition memory and metacognition are  
30       influenced by the emotional contents of encoded items and that this correlation is in part related  
31       to cardiac activity.

32       **Introduction**

33       The metacognitive ability to monitor our thoughts, memories and perceptual experiences is an  
34       important part of learning, development and communication (Fleming et al., 2012; Heyes et  
35       al., 2020; Shea et al., 2014). In the context of eyewitness testimony, for example, we know that  
36       memory itself is a fragile internal signal which is prone to substantive decay over time (Davis  
37       & Zhong, 2017; Otgaar et al., 2019). Episodic recall can be biased by the context of encoding  
38       (Yonelinas & Ritchey, 2015) - if the witness was held at gunpoint - and also by the context of

39 active recall - if the witness was nervous on the stand (Ochsner, 2000). A reliable witness  
40 should therefore not only recall events as experienced in detail but also accurately assess the  
41 fidelity or confidence associated with those memories. As little is currently known about the  
42 ability to self-monitor memory for emotional stimuli, we conducted a confirmatory, pre-  
43 registered investigation of emotional metamemory.

44 Metacognition refers to a higher-order executive capacity to monitor lower-order  
45 representations and to assess the fidelity and strength of these signals, in order to update a  
46 model of the probability that one is making correct judgements (Yeung & Summerfield, 2012).  
47 More specifically, metacognition for memory or metamemory refers to the ability to monitor  
48 and assess the accuracy and precision of the recollection of a past episode. This ability can be  
49 influenced by the level of details and the “feeling-of-knowing” associated with a memory  
50 (Chua et al., 2014; Reggev et al., 2011). In the context of the witness testimony example, if the  
51 suspect had an unremarkable face or the memory was hazy, then a witness may report lower  
52 confidence in their recollection. Conversely, a witness who is unable to accurately report their  
53 confidence in a recollection may mislead a jury.

54 In controlled laboratory settings, classic metacognition experiments often require  
55 participants to view a stimulus, make a decision (e.g., whether the stimulus is known or  
56 unknown), and report their confidence in this judgement. Healthy individuals typically display  
57 reasonably accurate metacognitive insight and achieve a high correlation between confidence  
58 and accuracy, even in the absence of external feedback. Metacognition tasks have been applied  
59 to investigate a variety of cognitive domains including visual perception (Allen et al., 2016;  
60 Fleming et al., 2015), memory (Fleming et al., 2014), or value-based decision-making (De  
61 Martino et al., 2013). However, even with these simple lab-based tasks, participants exhibit  
62 substantive interindividual differences in metacognitive ability, and a variety of manipulations  
63 can reliably dissociate confidence and accuracy by biasing subjective confidence reports  
64 (Fleming et al., 2015; Rollwage et al., 2020).

65 Though little is known about how emotion influences metacognition, previous  
66 investigations of memory and emotion highlight stimulus valence and arousal as likely sources  
67 of bias for metamemory. For example, the emotional content of valenced words, either positive  
68 or negative, can bias the learner’s prediction of subsequent accurate recall (Tauber & Dunlosky,  
69 2012; Zimmerman & Kelley, 2010). Similarly, arousal at encoding is associated with greater  
70 amygdala activation (Kensinger & Corkin, 2004), which can enhance subsequent memory  
71 performance (Cahill & McGaugh, 1998). Flashbulb memories (i.e., vivid and detailed  
72 memories encoded under arousing conditions) are recalled more easily and with less decay  
73 under specific circumstances (Shields et al., 2017; Yonelinas & Ritchey, 2015). This line of  
74 evidence suggests that emotional content, especially those of a highly arousing or negative  
75 nature, could bias the salience of the memory signal during recall. This can ultimately result in  
76 overconfidence which, in the context of testimony, could bias the individual when estimating  
77 the accuracy of his/her recall.

78 Additionally, a core aspect of emotion is that it often coincides with and is triggered by  
79 changes in internal bodily states like physiological arousal (James, 1884), which is expressed  
80 by indices of autonomic activity such as cardiac or respiratory frequency (Kreibig, 2010). Heart  
81 rate is for example altered both when perceiving emotional stimuli and during their encoding  
82 and recollection (Abercrombie et al., 2008; Critchley et al., 2005; Legrand et al., 2018). This  
83 bodily arousal can exert a substantial effect on the mapping between confidence and decision

84 accuracy, which can ultimately also bias metacognition. Both experimental and  
85 pharmacological modulations of arousal have been shown to bias metacognitive insight,  
86 modulating confidence for error trails in a visual task (Allen et al., 2016; Hauser et al., 2017).  
87 We thus hypothesized that both the valence and arousal of an event modulate the accuracy of  
88 memory itself, and investigated whether healthy individuals are aware of such ‘hot’ or ‘cool’  
89 effects on their recognition accuracy, physiological levels of arousal, and whether these effects  
90 also influence retrospective metamemory.

91 To test the hypothesis that emotional valence and arousal modulate metamemory, we  
92 conducted a pre-registered experiment in which participants memorized lists of words  
93 presented according to their valence and arousal levels. Although most metamemory research  
94 has relied on “feeling of knowing” self-report measures, these can be subject to substantive  
95 biases, i.e. such as conflating self-report bias with metacognitive sensitivity, or being  
96 confounded by overall accuracy level (Fleming & Lau, 2014). To overcome these issues, we  
97 adapted a signal-theoretic modelling approach to estimate metamemory for emotional versus  
98 unemotional words. If arousal primarily biased memory by increasing the gain or salience of  
99 encoded items, we would expect to observe a positive main effect of item arousal on both  
100 accuracy and metacognitive confidence. Conversely, if emotion primarily biased  
101 metacognition through a valence-specific ‘anchoring’ effect, we would expect to observe a full  
102 interaction of stimulus arousal and valence on both measures. As a third alternative, if  
103 metacognition were robust to emotional biases, we would expect to observe the effects of  
104 stimulus valence and arousal on accuracy and response speed, but not on confidence or  
105 metacognition. To complement these analyses, we further recorded cardiac measures of  
106 physiological arousal through pulse oximetry, to assess their mediating effect on the association  
107 between confidence and accuracy.

108

## 109 **Materials and methods**

### 110 *Pre-registration and Open Materials*

111 To improve our control of type-I and type-II error rates, as well as the overall transparency and  
112 rigour of the study, the trial was pre-registered before any data collection using the standard  
113 Open Science Foundation template. Detailed information regarding power analysis, sample  
114 size considerations, experimental and trial design, planned analyses and other key points can  
115 be found at the following URL: (<https://osf.io/9awtb>). In what follows, Confirmatory Analyses  
116 and Results refer to planned analyses detailed in the pre-registration, whereas Exploratory  
117 Analyses and Results refer to post-hoc exploratory analyses conducted following contact with  
118 the data. Additionally, in the case of any minor deviation from the pre-registration, these are  
119 documented on a case by case basis.

### 120 *Participants*

121 Thirty-five participants (26 females) between the ages of 18 and 26 ( $M = 21$ ,  $SD = 1.9$ ) were  
122 recruited through local advertisements and took part in the experiment at Aarhus University  
123 Hospital, Denmark. From the total sample of 35 participants, a sub-set of 30 participants passed

124 the pre-registered exclusion criteria and were analyzed further. All participants had normal or  
125 corrected to normal vision, were fluent in English and provided informed written consent  
126 before the experiment. The procedures were conducted following the Declaration of Helsinki  
127 and with approval from the Danish Neuroscience Centre's (DNC) Institutional Review Board  
128 (IRB). Participants received monetary compensation of 100 DKK per hour. The estimated total  
129 duration of the test session was 1,5 hours (150 DKK). Participants also completed a post-test  
130 stimulus validation measure in which they provided valence and arousal ratings for all stimuli  
131 for an additional 50 DKK. All 35 participants completed the follow-up rating experiment.

132

### 133 ***Procedure***

134 The experimental procedure included one laboratory and one at-home survey session on two  
135 different days with one week in between. In the laboratory session, participants completed a  
136 word recognition metamemory task designed to assess the effects of valence and arousal on  
137 verbal recognition memory and metacognition. In the survey session, participants rated their  
138 subjective feelings of valence and arousal evoked by the words used during the laboratory  
139 session.

140 At the beginning of the laboratory session, participants were briefed on the nature of the  
141 investigation, were provided task instructions and completed a brief training session of the  
142 metamemory task. The training included an example learning phase of 50 neutral and  
143 unarousing words, followed by an example testing phase of 10 trials with confidence ratings  
144 (see Metamemory Task and Stimuli).

145 During the metamemory task, heart rate was monitored using a Nonin 3012LP Xpod USB  
146 pulse oximeter together with a Nonin 8000SM 'soft-clip' fingertip sensor  
147 (<https://www.nonin.com/>) attached to the left index finger.

### 148 ***Word selection***

149 Stimuli consisted of 1200 English words selected from the ANEW database based on valence  
150 and arousal ratings measured among a population of American students (Bradley & Lang,  
151 1999). Although ANEW is not validated in the Danish population, previous standardization of  
152 the database in Dutch, Spanish and Italian populations (Montefinese et al., 2014; Moors et al.,  
153 2013; Redondo et al., 2007) showed good consistency across both American and European  
154 samples. We created 4 distinct subgroups of 300 word stimuli, according to a 2 by 2 factorial  
155 design, where the factors corresponded to valence (positive vs. negative) and arousal (low vs.  
156 high). To this aim, we used the tertile of the valence and arousal distribution to exclude words  
157 with intermediate ratings, whose valence and arousal might be ambiguous (see Fig. 2a).

### 158 ***Metamemory Task***

159 Participants completed a word recognition metamemory task adapted from previous studies  
160 (McCurdy et al., 2013) to test the influence of emotional valence and arousal on memory and  
161 metacognition. The task included 12 blocks, each consisting of a learning phase (Fig. 1a) and  
162 a testing phase (Fig. 1b). In the learning phase, participants viewed a list of 50 English words  
163 for durations of 30, 60 or 90 seconds. The words were presented on the screen in the form of a  
164 table containing five columns with ten rows of words each, and the participants were instructed  
165 to memorize as many words as possible. The list of words in each learning phase corresponded

166 to a unique combination of the following factorial conditions: Valence (positive, negative),  
167 Arousal (low, high). Participants were notified when 10 seconds of learning time was left by  
168 the display of a small warning at the bottom of the screen. During the testing phase, participants  
169 completed 50 trials designed to measure recognition memory and metamemory. On each trial,  
170 two-word stimuli were presented to the left and right of a fixation cross. The word pair  
171 consisted of a “target” and a “distractor”, corresponding to words that were present or absent  
172 in the previous learning phase, respectively. Target and distractor words were matched by  
173 valence and arousal, and their position was randomized across trials. Participants were  
174 instructed to press either the left or the right arrow key to indicate which of the two words they  
175 recognized from the memorized list. This procedure corresponds to a two-alternative forced-  
176 choice task (2AFC) design, which provides optimal conditions for estimating and comparing  
177 metacognition scores across tasks (Lee et al., 2018). Following the button press, participants  
178 provided a subjective confidence rating from 1 (“not confident at all/guessing”) to 7 (“very  
179 confident”). Both button presses and confidence ratings had a maximum time-limit of 3s. If  
180 participants had slower responses, a brief message (i.e., “too slow!”) was displayed on the  
181 screen and the trial was marked as missed.

182 The blocks were presented in a pseudo-randomized order to ensure that high arousal blocks  
183 were systematically interleaved with low-arousal blocks. The block order and the selection of  
184 target vs. distraction lists were counterbalanced across participants.  
185

## A. Experimental design

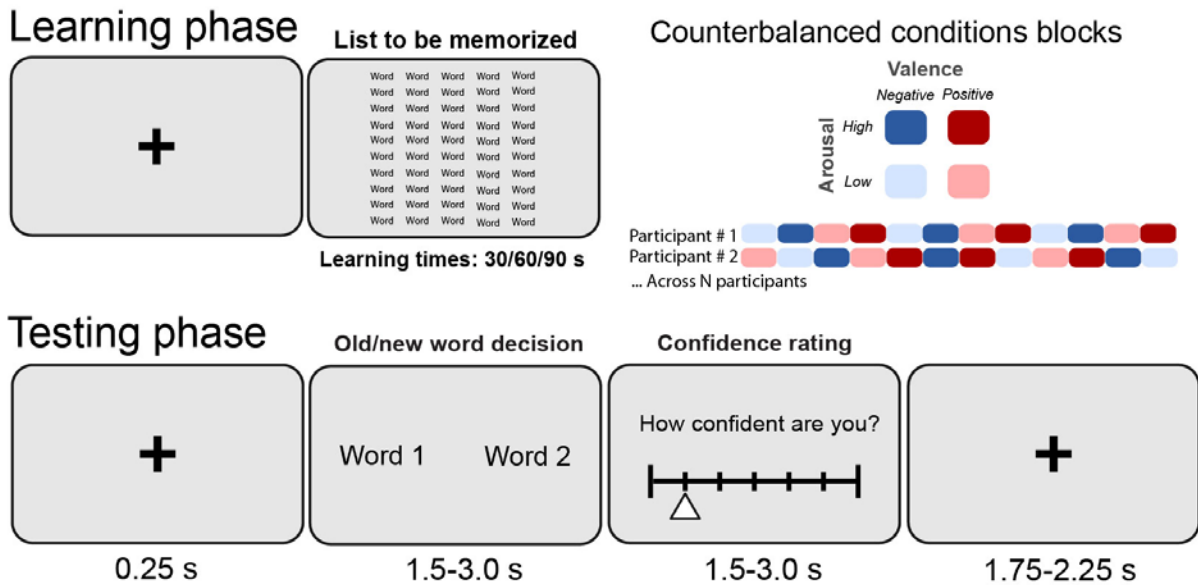

## B. Post-experimental survey

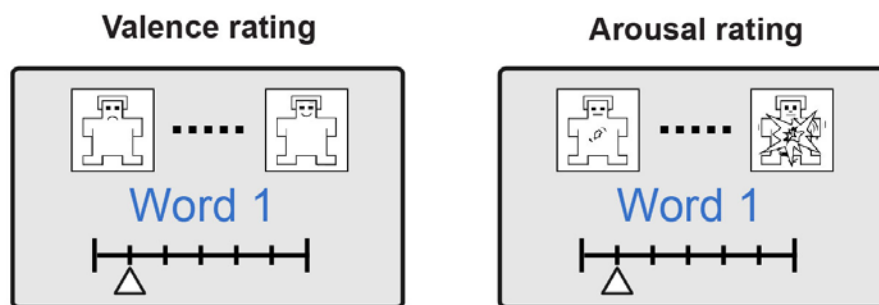

186

187

188 **Figure 1: A.** Experimental design. The metamemory task contained 12 experimental blocks, each consisting of a  
 189 learning phase and a testing phase for the 50 words, in a factorial design separated by each Valence and Arousal  
 190 condition. To limit habituation effects, block orders were counter-balanced in a pseudo-randomized order such  
 191 that each high arousal block was interceded by a low arousal condition. **B.** Post-experimental survey. To validate  
 192 our stimulus categories with respect to the original ANEW ratings, participants completed a short subject visual  
 193 analog scale rating of valence and arousal for the 1200 words used in the main task (600 target and 600 distractors)  
 194 in an at-home experiment. This was done in a web-based version of the original procedure used in the original  
 195 ANEW survey.

### 196 *Valence and Arousal Rating Task*

197 To validate the arousal and valence stimulus categories in our Danish sample, participants  
 198 completed an at-home valence and arousal subjective rating task. They were instructed to  
 199 provide valence and arousal ratings of their subjective experience associated with each word  
 200 presented in the metamemory task. The ratings were collected using a 9-point visual numerical  
 201 scale in a web-based version of the original ANEW survey protocol (Bradley & Lang, 1999).  
 202 Our version was implemented using Pavlovia (<https://pavlovia.org>), an online platform for  
 203 running PsychoPy experiments (Peirce et al., 2019). Each word was presented twice, once for  
 204 valence and once for arousal, and the 9-point scales were complemented with pictures of the

205 original drawings of the Self-Assessment Manikin (Bradley & Lang, 1994), as in the original  
206 ANEW survey (Bradley & Lang, 1999). Participants rated a total of 1200 words, self-pacing  
207 through all rating trials. We compared the ratings provided by the participants in this study with  
208 the normative ANEW ratings using a Spearman rank correlation test (see Fig. 2 c & d). After  
209 inspecting histograms of participant responses, we excluded one participant, who only ever  
210 pressed the same key (rating 5); this exclusion criteria was not noted in the pre-registered  
211 protocol. Overall, stimulus ratings in our sample corresponded very well to the original ANEW  
212 ratings,  $\rho = [0.93-0.78]$ , albeit with lower overall consistency for the arousal vs. valence  
213 dimension (Fig. 2).

214  
215  
216

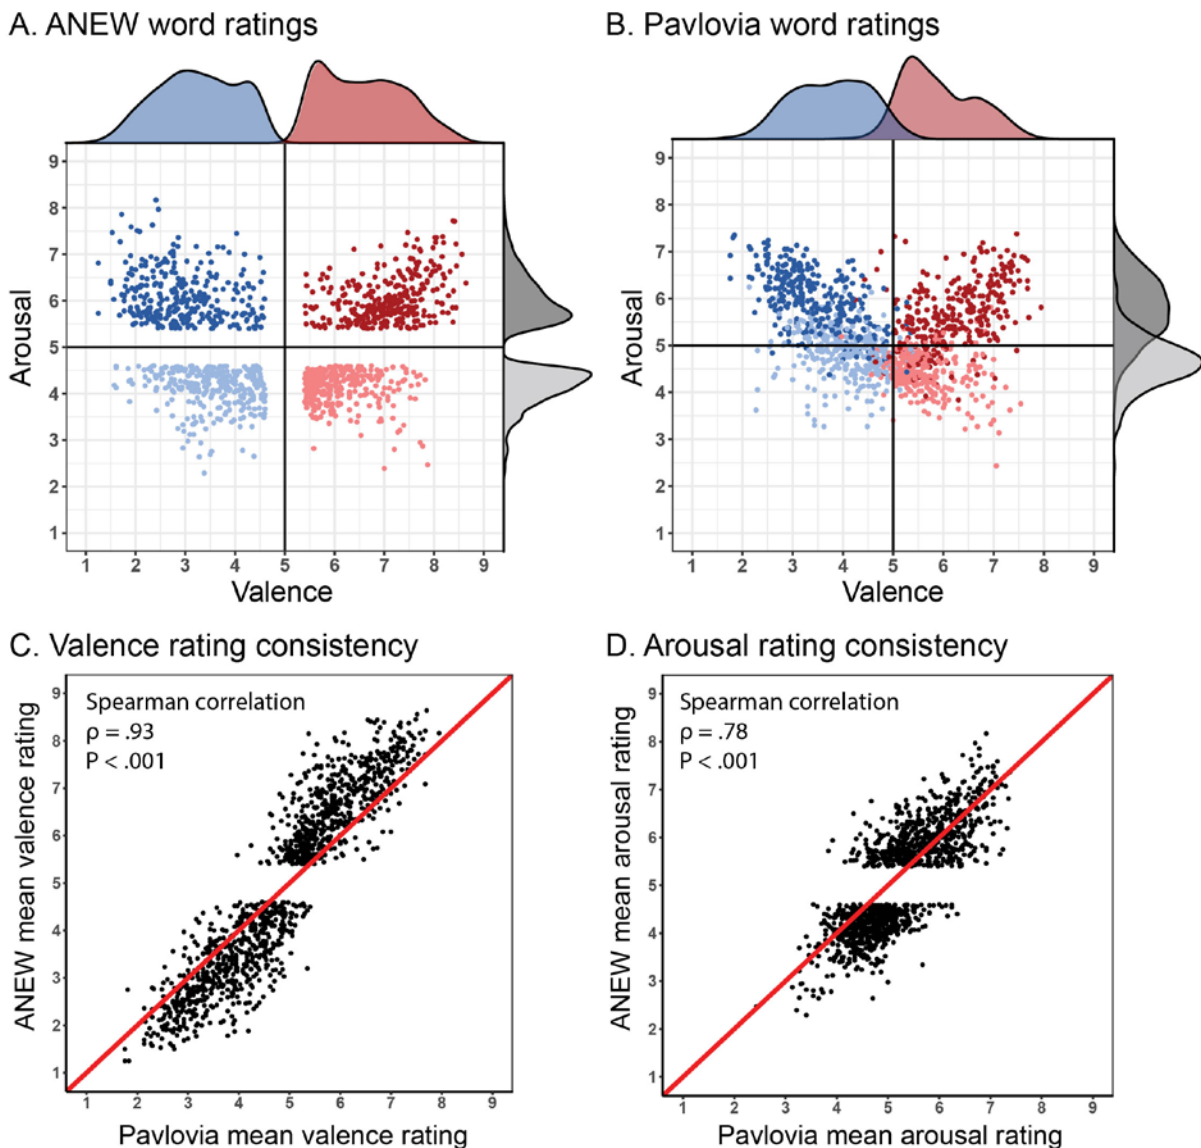

217  
218 **Figure 2: Stimulus selection and rating validation.** Two rating procedures were used to select and validate word  
219 stimuli; the original ANEW normed ratings and the PAVLOVIA at-home ratings completed by our participants in  
220 the post-experimental survey. Each word was rated on a 9-point scale (1-9) for valence and arousal separately. **A**  
221 **& B.** We selected the words used in the metamemory task by removing items from the central tertile in the arousal and valence rating distributions (panel A). The blue and red dots represent words with negative and positive valence, respectively. The light and dark points represent low and high arousal, respectively. The densities represent the distribution for positive and negative valence (red and blue), and arousal (light and dark). **C & D.**

225 We compared the independent rating provided by the ANEW database to the actual ratings provided by the  
226 participants, PAVLOVIA, after the main procedure. Both ratings of valence and arousal showed reasonably high  
227 consistency,  $\rho = [0.93-0.78]$ . See online article for colour figures. The black dots represent each word in the  
228 datasets and the red line shows the identity line.

### 229 ***Signal Theoretic Metacognition Modelling***

230 Here we applied a signal-theoretic computational model to describe participant behaviour on  
231 the metamemory task (Fleming, 2017; Maniscalco & Lau, 2012). This approach delineates  
232 overall behaviour into ‘type-I’ and ‘type-II’ measures, corresponding to a basic decision versus  
233 metacognitive levels of performance (Galvin et al., 2003). Type-I performance was quantified  
234 using reaction times (RTs) and the signal-detection theoretic (SDT) measures of d-prime (D’)  
235 and criterion (c) (Macmillan & Creelman, 2004). Type-II performance (i.e., metacognition)  
236 was assessed by the SDT measures of Meta-d’ and Meta-ratio (M-ratio) (Fleming & Lau,  
237 2014). All SDT-based measures were estimated using a hierarchical Bayesian approach, fit to  
238 individual subjects (Fleming, 2017). This model has been extensively described and validated  
239 previously (Fleming, 2017; Mazancieux et al., 2020; Morales et al., 2018), here we recount the  
240 basic details to aid interpretation of our results.

241 D-prime or d’ is a measure of a participant’s sensitivity to detect previously studied words  
242 during the learning phase, independently from subjective response biases. Instead, criterion or  
243 c’ encodes the participant’s response bias, that is, the overall tendency to prefer one response  
244 over the other (e.g., if a participant chose the word presented to the left of the fixation point  
245 more often than the alternative). Together with measures of reaction time, d’ and c’ are metrics  
246 of “first-order” or “type-I” task performance. In contrast, Meta-d is an estimate of the  
247 sensitivity of subjective confidence ratings to type-I performance (i.e., the probability to be  
248 highly confident when correct, or uncertain when incorrect). Meta-d’ is, therefore, a measure  
249 of insight, or how well one can consciously discriminate their own type-I performance (Lau &  
250 Rosenthal, 2011). However, metacognitive sensitivity is also a function of the overall  
251 perceptual signal, and as such is substantively influenced by differences in d’. To control for  
252 this effect, the ‘M-ratio’ (Meta-d’/d’) is estimated as a measure of metacognitive efficiency,  
253 denoting how a subject’s metacognitive sensitivity over- or underperforms what can be  
254 expected given their type-I sensitivity (Fleming & Lau, 2014). Finally, average confidence on  
255 each condition denotes participants “meta-criterion or meta-c”, or their overall level of  
256 metacognitive bias denoting the tendency to be confident or uncertain irrespective of accuracy.  
257 Meta d’ and meta-c are metrics of “second-order” or “type-II” performance.

258

### 259 ***Confirmatory Analyses***

260 Metamemory task

261 All data were pre-processed according to the protocols established in our pre-registration.  
262 Accordingly, we excluded all trials with reaction times (RT) faster than 100 ms, greater than 3  
263 standard deviations from the median RT, and missing data (absence of response or because the  
264 response button was pressed too early or too late). Due to an unforeseen technical error, an  
265 absence of response in some trials contaminated the following trial, resulting in negative



266 response times. These trials were also automatically rejected. This procedure resulted in the  
267 exclusion of 3.49% ( $\pm 3.68$ ) of the trials. Finally, outliers in task performance for each of the  
268 conditions were detected based on reaction time,  $d'$ , and confidence distributions. We also  
269 excluded participants showing any extreme value using Tukey's boxplots. Based on these  
270 criteria, 5 participants were excluded from all behavioral analyses. These preprocessing steps  
271 are also extensively described in the interactive Jupyter notebooks made available on the  
272 repository: <https://github.com/embodied-computation-group/EmotionMetamemory>.

273 To quantify memory performance and metacognition, each subject's performance on the  
274 2AFC task was modelled using a signal-detection theoretic (SDT) approach (Fleming & Lau,  
275 2014). Briefly, this approach models metacognitive "hits" (e.g., high/low confidence for  
276 correct/error trials, respectively) and "misses" (e.g., high/low confidence for error/correct  
277 trials, respectively). This yielded type-I measures of sensitivity ( $d'$ ) and criterion/bias ( $c$ ), as  
278 well type-II metacognitive measures of meta- $d'$ , M-ratio and mean confidence. To further  
279 characterize task performance, we also calculated the median response time (RT) for each  
280 condition.

281 The preprocessing of the behavioral data was carried out using custom R scripts, using R  
282 Studio (1.2.5019), the R software (R 3.6.1), and Python scripts using Python 3.7.6. The  
283 Bayesian and frequentist statistical models were implemented using the JASP software  
284 (<https://jasp-stats.org/>) version 0.12.2 and the R package (AFEX 0.27-2). All Type-1 and Type-  
285 2 SDT measures ( $d'$ , criterion, meta- $d'$ , m-ratio, and mc) were derived from the hierarchical  
286 meta-cognition model (HMM) (Fleming, 2017) implemented in R  
287 (<https://github.com/metacoglab/HMeta-d>), run on the individual level to enable frequentist  
288 analysis of the resultant parameters.

## 289 Heart Rate Monitoring

290 We monitored instantaneous heart rate variability using a Nonin 3012LP Xpod USB pulse  
291 oximeter together with a Nonin 8000SM 'soft-clip' fingertip sensor (<https://www.nonin.com/>).  
292 Pulse oximeters indirectly measure peripheral blood oxygen saturation. The abrupt cyclic  
293 increase of oxygenation reflects blood pulse following cardiac contraction. Here, we used the  
294 pulse-to-pulse intervals to estimate the instantaneous heart rate. Oxygenation saturation level  
295 was continuously recorded at a 75 Hz sampling rate. The preprocessing of the pulse oximetry  
296 recording was carried out using Python scripts (Python version 3.7.6) and version 0.1.1 of the  
297 Systole Python package (Legrand & Allen, 2020). Statistical analyses were carried out using  
298 the Pingouin Python package (Vallat, 2018) and MNE Python (Gramfort, 2013). PPG signals  
299 were first upsampled to 1000 Hz and clipping artefacts were corrected using spline  
300 interpolation following recent recommendations (van Gent et al., 2019). The signal was then  
301 squared for peak enhancement and normalized using the mean + standard deviation using a  
302 rolling window (window size: 0.75 seconds). All positive peaks were labelled as systolic  
303 (minimum distance: 0.2 seconds). We then detected ectopic, long, short, missed and extra beats  
304 using adaptive thresholds over the successive beats-to-beats interval (Lipponen & Tarvainen,  
305 2019), as implemented in Systole (Legrand & Allen, 2020). The code implementing these steps  
306 can be found in the Jupyter notebooks made available in the repository:  
307 <https://github.com/embodied-computation-group/EmotionMetamemory>.

308 **Instantaneous Pulse Rate.** All pulses labeled as missed or extra beats were corrected by  
309 adding or removing beats, respectively. We then interpolated the instantaneous heart rate at 75  
310 Hz to a continuous recording using the previous values and divided it into epochs (from -1  
311 second pre-trial to 6 seconds after the word presentation). All the epochs that contained, or  
312 were adjacent to, an interval that was labeled as long, short or (pseudo-)ectopic beats were  
313 automatically rejected, resulting in an average rejection rate of 18.22% ( $\pm 11.49\%$ ). The  
314 instantaneous heart rate was then averaged across trials for each condition and downsampled  
315 to 5 Hz for subsequent analyses.

316 **Linear regression.** In an exploratory analysis, we used the instantaneous pulse rate as a  
317 predictor of confidence over time to track the relationship between cardiac frequency  
318 modulation and metamemory. We extracted the data following the same procedure, this time  
319 using 1s before the trial start as a baseline and using the initial sampling rate (75 Hz) to facilitate  
320 cluster-based statistical tests. Cluster-based permutation testing was performed using the  
321 *permutation\_cluster\_test()* and the *permutation\_cluster\_1samp\_test()* functions from the MNE  
322 Python package (Gramfort, 2013). This enabled us to assess significant point-to-point  
323 deviations from zero in encoded responses while controlling for multiple comparisons.

324 **Pulse Rate Variability.** Besides the analysis of the instantaneous pulse rate, we also  
325 performed pulse rate variability analyses. Although targeting a different physiological signal  
326 as compared to a classic electrocardiogram (ECG), the varying length of pulse cycle provides  
327 a sufficiently accurate estimation of the underlying heart rate variability (HRV) when used at  
328 rest for healthy young participants (Schäfer & Vagedes, 2013). Here, we extracted the systolic  
329 peak intervals using the method presented above. Intervals labeled as missed or extra beats  
330 were corrected by adding or removing beats, respectively. Additionally, intervals that were  
331 labeled as short, long, or (pseudo-)ectopic beats were corrected using linear interpolation.  
332 Following our specification in the pre-registration, we reported heart rate variability metrics in  
333 the time (RMSSD, pnn50) and frequency domain (normalized and non-normalized high and  
334 low-frequency power), as well as non-linear indexes (SD1 and SD2). These indexes reflect  
335 changes in beat-to-beat intervals and measure sympathetic and parasympathetic influences on  
336 the heart (Shaffer et al., 2014; Shaffer & Ginsberg, 2017). We inspected the resulting time  
337 series and rejected noisy and unreliable segments (2 segments were rejected in total). The  
338 values of each metric were then averaged across learning time (30, 60 or 90 seconds), and the  
339 summary variables were entered into a 2 by 2 repeated-measures ANOVA with factors stimulus  
340 arousal (arousing vs. unarousing) and valence (positive vs. negative).

## 341 **Results**

### 342 ***Behavioral Results***

#### 343 **Overview**

344 Following our pre-registration, the behavioral analyses focused on two levels of performance  
345 during the metamemory task: type-I variables corresponding to the discrimination ability, and  
346 type-II variables describing metacognition. To assess memory performance, we analyzed  
347 decision accuracy, discrimination sensitivity ( $d'$ ), bias ( $c$ ), and response time (RT). To assess  
348 metacognition, we analyzed average confidence (i.e., metacognitive bias), metacognitive

349 sensitivity (Meta-d'), and metacognitive efficiency (M-ratio, Meta-d'/d'). All signal theoretic  
350 measures (d', c, Meta-d', and M-ratio) were estimated using a unified Bayesian approach, as  
351 described previously (Fleming, 2017). All posthoc tests were corrected for multiple  
352 comparisons using the Holm procedure. Here, we reported only the key details of the significant  
353 effects; full ANOVA tables and associated statistics for all analyses can be found in our JASP  
354 notebooks located online at the following URL: [https://github.com/emodied-computation-](https://github.com/emodied-computation-group/EmotionMetamemory/tree/master/Data/Preprocessed/JASP)  
355 [group/EmotionMetamemory/tree/master/Data/Preprocessed/JASP](https://github.com/emodied-computation-group/EmotionMetamemory/tree/master/Data/Preprocessed/JASP)

#### 356 Recognition Memory (Type-I)

357 First, we examined the influence of emotional Valence and Arousal on decision accuracy, in a  
358 two-way repeated measures ANOVA, collapsing across block and learning time conditions.  
359 We found a significant main effect of Valence ( $F_{(1,29)} = 9.887$ ,  $\eta_p^2 = 0.254$ ,  $p = 0.004$ ), as well  
360 as a significant interaction between Valence and Arousal ( $F_{(1,29)} = 7.779$ ,  $\eta_p^2 = 0.212$ ,  $p = .009$ ),  
361 as positive words were recognized more accurately than negative ones under low arousal  
362 conditions ( $T_{(29)} = 4.20$ ,  $p_{\text{Holm}} < 0.001$ ). Similarly, for sensitivity (d'), we found a significant  
363 effect of Valence ( $F_{(1,29)} = 11.34$ ,  $\eta_p^2 = 0.28$ ,  $p = 0.002$ ), as negative words decreased d', as well  
364 as an interaction between Valence and Arousal ( $F_{(1,29)} = 7.34$ ,  $\eta_p^2 = 0.20$ ,  $p = 0.011$ ), as positive  
365 words were recognized more sensitively than negative ones under low arousal conditions  
366 ( $T_{(29)} = 4.304$ ,  $p_{\text{Holm}} < 0.001$ ). When analyzing the median response time, we observed a  
367 significant effect of Valence ( $F_{(1,29)} = 0.55$ ,  $\eta_p^2 = 0.16$ ,  $p = .025$ ), an effect of Arousal ( $F_{(1,29)} =$   
368  $6.94$ ,  $\eta_p^2 = 0.19$ ,  $p = .013$ ) and an interaction between these two factors ( $F_{(1,29)} = 7.56$ ,  $\eta_p^2 =$   
369  $0.20$ ,  $p = .010$ ), revealing that participants responded faster to positive valence under the low  
370 compared to the high arousal condition ( $T_{(29)} = 3.80$ ,  $p_{\text{Holm}} = .002$ ). Analysis of response criterion  
371 revealed no significant main effects or interactions, and no other significant effects were found  
372 (all  $p_s > .05$ ).

373

#### 374 Metacognition (Type-II)

375 We then performed a second level of analysis on the metacognition data, comprising average  
376 confidence, meta-d and M-ratio. First, we performed a Valence  $\times$  Arousal repeated measures  
377 ANOVA on the average confidence. This procedure showed a strong effect of Valence ( $F_{(1,29)}$   
378  $= 14.98$ ,  $\eta_p^2 = 0.34$ ,  $p < 0.001$ ), as participants were more confident for positive valenced words.  
379 No other effects or interactions were significant. Participants were also more sensitive to their  
380 performance (Meta-d') when responding to positive valenced words (main effect of Valence  
381  $F_{(1,29)} = 11.28$ ,  $\eta_p^2 = 0.28$ ,  $p = 0.002$ ). Concerning the M-ratio (i.e., Meta-d'/d'), which measures  
382 metacognitive efficiency, we found no main effect or interactions (all  $p_s > 0.05$ ). Following  
383 our pre-registered protocol, we followed up this analysis with a Bayesian ANOVA (Rouder et  
384 al., 2012) implemented in JASP (version 0.12.2) (JASP Team, 2020), to assess the strength of  
385 evidence for the null effect. This analysis compares the evidence for nested models of  
386 increasing complexity; e.g., comparing a null model to those with only main effects of valence  
387 or arousal, or a full model with main effects and interaction terms. This revealed strong relative  
388 evidence for the null overall model (including subject offsets),  $BF_{\text{Model}} = 7.28$ ; the next best  
389 model was one with a main effect of Valence whose relative  $BF_{\text{Model}} = 0.74$ , i.e. inconclusive

390 evidence. This analysis suggests that under the default JASP priors, it is very unlikely that  
391 Valence, Arousal, or their interaction exerted any effect on metacognitive efficiency.  
392  
393

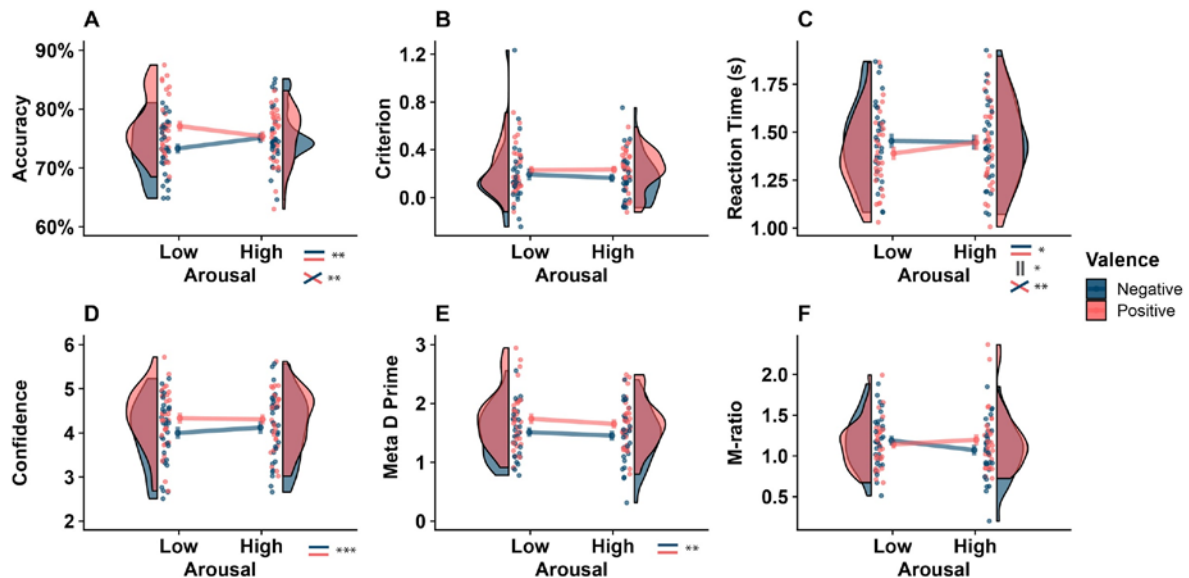

394  
395 **Legend Fig. 3.** Behavioral results showing factorial main effects and interactions on discrimination and  
396 metacognitive performance. Modified raincloud plots (Allen et al., 2019) illustrating behavioral results of  
397 discrimination measures of accuracy (A), criterion (B) and reaction time (C) as well as metacognitive measures of  
398 confidence (D), Meta-d' (E) and M-ratio (F). Repeated measures ANOVA (Valence  $\times$  Arousal) was carried out  
399 for each condition separately. The upper panel shows that a significant main effect of emotional valence was  
400 observed as negative valenced words reduced accuracy (A) and slowed down reaction times (C). Similarly, the  
401 lower panel shows a main effect of valence for both Confidence and Meta-d' are impaired by negative valence.  
402 (\*\*\*  $p < 0.001$ , \*\*  $p < 0.01$ , \*  $p < 0.05$ ).  
403

#### 404 *Physiological results*

##### 405 Pulse rate variability

406 First, we analyzed the effect of valence and arousal on the heart rate frequency during the  
407 experimental blocks. We averaged the estimated beats per minute (Mean BPM) across the  
408 different learning times (30, 60 and 90 seconds) and submitted it to a two-way repeated measure  
409 ANOVA (Valence  $\times$  Arousal). Results showed a main effect of Valence ( $F_{(1,29)} = 10.852$ ,  $\eta_p^2 =$   
410  $0.272$ ,  $p = 0.003$ ), meaning lower BPM for negative valenced words, but no other main or  
411 interaction effects.

412 For the low and high-frequency peak analysis, the peak high-frequency (HF peak) revealed  
413 an interaction between valence and arousal ( $F_{(1,29)} = 14.50$ ,  $\eta_p^2 = 0.33$ ,  $p < 0.001$ ) such that high-  
414 frequency cardiac oscillations were suppressed by negative emotional valence under low but  
415 not high arousal ( $T_{(29)} = 3.36$ ,  $p_{\text{Holm}} = .007$ ).

416 Concerning the Root Mean Square of the Successive Differences (RMSSD, not shown in  
417 Fig. 4), we found a main effect of valence ( $F_{(1,29)} = 6.74$ ,  $\eta_p^2 = 0.19$ ,  $p = .015$ ) i.e. negative  
418 valence increased RMSSD, but no other main effect or interaction (all  $p$ s  $< .05$ ).

419 When considering the proportion of successive beat-to-beat intervals deviating by more than  
420 50 ms (pnn50) we observed an effect of Valence ( $F_{(1,29)} = 24.17$ ,  $\eta_p^2 = 0.45$ ,  $p < 0.001$ ), as well  
421 as an interaction between Valence and Arousal ( $F_{(1,29)} = 4.54$ ,  $\eta_p^2 = 0.13$ ,  $p = .042$ ). Under high  
422 arousal the positive valence suppressed pnn50 while negative valence increased it ( $t_{(29)} = -4.98$ ,  
423  $p_{\text{Holm}} < 0.001$ ).

424 Finally, we also analyzed the effect of these factors on the non-linear metrics of heart rate  
425 variability SD1 and SD2. The SD2 metric revealed an effect of Valence ( $F_{(1,29)} = 35.20$ ,  $\eta_p^2 =$   
426  $0.55$ ,  $p < 0.001$ ), so that negative valence increased SD2 heart rate variability, but we found no  
427 other main effects or interactions. Concerning SD1, we found no significant effects (all  $p$ s  $>$   
428  $.05$ ). These results are illustrated in **Fig. 4**; here we reported the main significant effects,  
429 however full analyses details and results tables can be found in the HRV JASP notebook  
430 located on the Github repository for this study.

431  
432

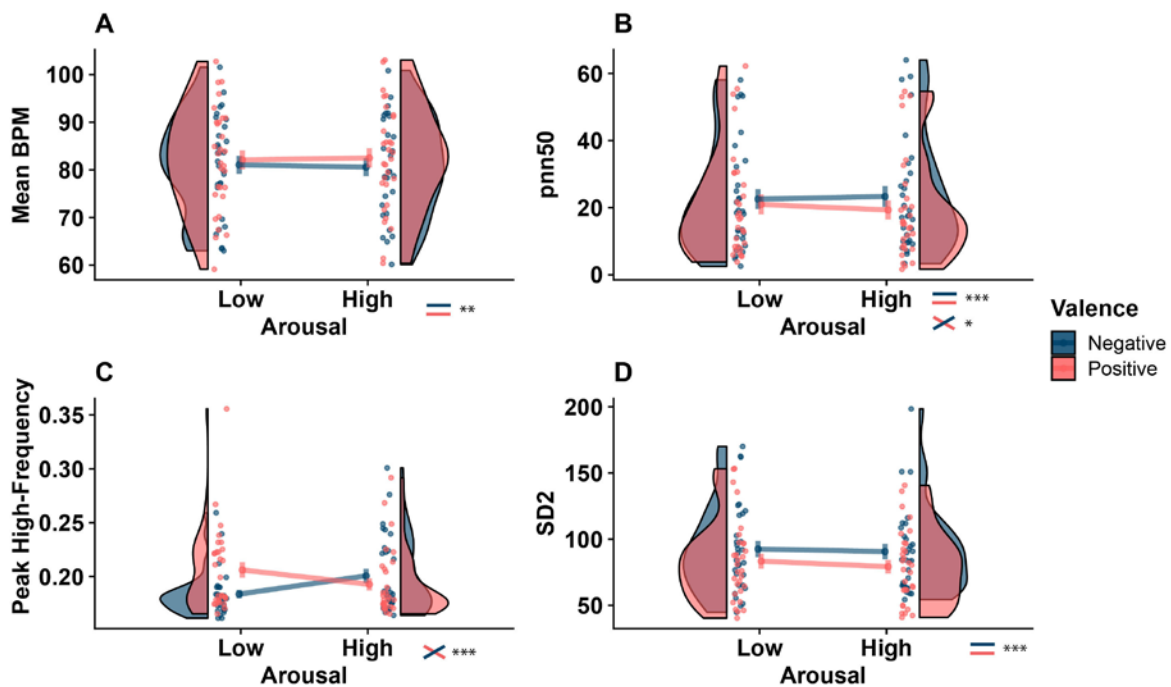

433  
434 **Fig. 4:** Modified raincloud plots illustrating results of pulse rate variability (PRV) analyses. PRV indices were  
435 calculated separately for each 50 trial block and averaged by condition. Mean BPM (A), Pnn50 (B), High-  
436 frequency peak (C), SD2 (D). Repeated measures ANOVA (Valence  $\times$  Arousal) was then carried out for each  
437 variable separately. A significant main effect of emotional valence was observed for mean BPM, as negative  
438 valence decreased cardiac activity frequency, as well as for the pnn50 and the non-linear SD2 metric. We did not  
439 observe a main effect of Arousal, but an interaction with valence was found for the high-frequency peak, such that  
440 high-frequency cardiac oscillations were reduced by negative emotional valence under low but not high arousal.  
441 No other significant effects were found. (\*\*\*)  $p < 0.001$ , \*\*  $p < 0.01$ , \*  $p < 0.05$ ). See *Methods* and *PRV Results* for  
442 more details.  
443

444 Event-related analysis

445 Next, we analyzed the time-locked instantaneous pulse rate fluctuation following word  
446 presentation. **Figure 5a** show the evoked cardiac frequency fluctuation following the display  
447 of the two words on the screen. Following the specification of the pre-registered report, we

448 analyzed the average of this fluctuation across time (**Figure 5b**). Here, we observed no effect  
449 of Valence, ( $F_{(1,28)} = 0.398$ ,  $\eta_p^2 = 0.014$ ,  $p = 0.533$ ), Arousal ( $F_{(1,28)} = 0.021$ ,  $\eta_p^2 = 0.001$ ,  $p =$   
450  $0.88$ ) or an interaction between these two factors ( $F_{(1,28)} = 0.077$ ,  $\eta_p^2 = 0.003$ ,  $p = .78$ ).

451 Linear regression

452 In an additional exploratory analysis, we also tested the possible interaction between the  
453 instantaneous pulse rate modulation observed during decision and metacognition and the  
454 subjective report provided by the participant. For each participant and condition separately, we  
455 used the reported confidence  $C$  and the instantaneous pulse rate BPM at each time point  $s$  of  
456 the trial  $t$  to fit a linear regression of the form:

457

$$\text{BPM}_{s,t} = \alpha_s + \beta_s \times C_t + \varepsilon$$

459

460 All variables were normalized and beta-values for each explanatory regressor and participant  
461 were extracted for statistical analysis. First, to test for a difference in beta values from 0 across  
462 time across all conditions, i.e. the average effect of trial by trial confidence reports on  
463 fluctuations in evoked heart-rate, replicating previous analysis linking these variables (Allen et  
464 al., 2016). We averaged between conditions assessed significance via non-parametric cluster-  
465 level t-test. Results show a significant cluster (3.94-5.65 seconds after stimulus presentation,  $p$   
466  $= 0.001$ ). As our HRV and behavioral results emphasized a main effect of stimulus valence on  
467 both metacognitive behaviour and cardiac activity, we then compared the association between  
468 confidence and instantaneous cardiac activity between different valence and arousal conditions.  
469 When comparing positive and negative valence conditions (averaging across arousal levels)  
470 we found a significant early cluster (1.20-2.96 seconds after stimulus presentation, cluster  
471  $p=0.047$ ), suggesting that stimulus valence modulates the correlation between evoked heart-  
472 rate and confidence. Finally, we repeated this comparison for high vs. low arousal conditions,  
473 collapsing stimulus valence. This analysis found no significant clusters. See Fig. 5 for  
474 illustration of these results.

475

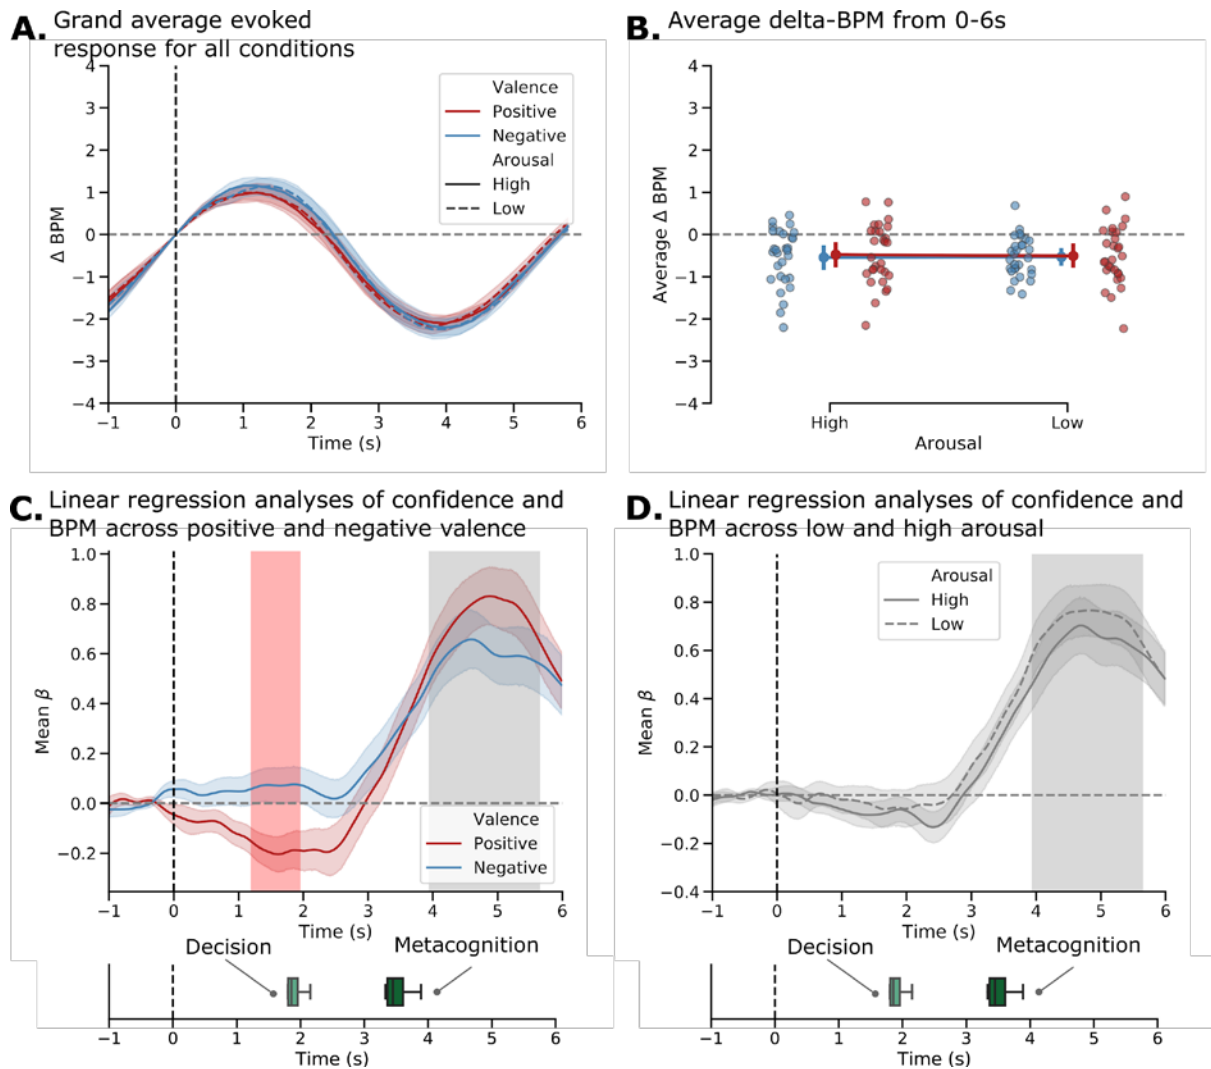

476  
477  
478  
479  
480  
481  
482  
483  
484  
485  
486  
487  
488  
489  
490  
491

**Fig. 5: Modulation of the cardiac activity at the trial level and its relation with reported subjective confidence.** **A.** Evoked pulse rate activity shows that the overall experimental procedure modulated the instantaneous cardiac frequency over time through an early acceleration component after the trial start (0-2 s) and a later deceleration component (2-6 s). This pattern is consistent with an orientation reflex, suggesting early brief integration and later sensory or memory processing. Interestingly, these two components are also time-locked with the decision and metacognition average response time. Here, we did not observe any difference between the experimental conditions. **B.** We averaged the instantaneous pulse rate in the window of interest (0-5 s) and confirmed this absence of effect and an overall diminution of cardiac frequency after the trial start. **C.** Beta values over time of the linear regression (Confidence ~ BPM) for positive and negative valence trials separately. The confidence level was associated with the instantaneous cardiac frequency during the late time window corresponding to the metacognition decision. **D.** Beta values over time of the linear regression (Confidence ~ BPM) for high and low arousal trials separately. Using the same approach, contrasting for High and Low level of arousal. Significance assessed using a cluster-level statistical permutation test ( $\alpha=0.05$ ). Shaded areas and error bar show the 68% CI. Significant clusters are shown by a shaded red path for condition contrast, and grey path for null tests. See online article for colour figures.

## 492 Discussion

493 How well do we remember emotional events? If there were any influence of emotion on our  
494 memory, would we be metacognitively aware of it? In this study, we investigated these  
495 questions through a combination of experimental psychology, cognitive modelling, and  
496 psychophysiology. To do so, we adapted a recognition memory paradigm such that participants

497 memorized lists of words varying in arousal and valence. Stimulus valence exerted a consistent  
498 influence on recognition performance, metacognitive confidence, and physiological arousal. In  
499 most cases, this effect was greatest for low vs. high arousal words, suggesting that the influence  
500 of stimulus valence on metamemory depends in part on their overall arousal level. We also  
501 observed a strong association between the subjective confidence reported by the participant  
502 and the evoked pulse rate, which was also marginally modulated by the word valence. Our  
503 results demonstrate that although recognition memory is impaired for negative emotional  
504 stimuli, participants can accurately monitor and report this uncertainty. Further, this ability to  
505 monitor the effect of emotion on memory may depend in part on integrating the associated  
506 changes in cardiac arousal signals.

507 Across multiple indices of memory performance, we found that negative stimulus valence  
508 significantly reduced recognition speed and sensitivity; in some cases, this effect interacted  
509 with stimulus arousal. This result contrasts with the notion, supported by other lines of research,  
510 that emotional events are better recalled than neutral ones (Yonelinas & Ritchey, 2015), and  
511 that arousal enhances later memory of that event and the surrounding ones. However, it is worth  
512 noting that this facilitating effect of negative valence is not universally reported, and other lines  
513 of research have shown that negative valence can weaken the traces, rendering memories less  
514 intrusive and more forgettable (Gagnepain et al., 2017; Legrand et al., 2018).

515 Whereas the effect of stimulus valence on type-I performance was largely dependent on  
516 arousal, for metacognitive type-II variables we observed only a pronounced main effect of  
517 valence with no arousal effect or interaction. In general, participant confidence reports closely  
518 matched the overall effect of stimulus emotion on performance; negative valence decreased  
519 sensitivity, increased reaction times, and decreased confidence. The robust evidence we  
520 observed for their being no effect on metacognitive-efficiency (M-ratio) further underlines this  
521 finding; the strong null Bayes factor here demonstrates that shifts in subjective confidence were  
522 well reflected by the magnitude of any changes in type-I sensitivity, indicating that subjects  
523 make optimal use of the available memory signal during metacognitive judgements,  
524 irrespective of any conditional valence or arousal effects. This finding may have important  
525 implications for understanding the reliability of metamemory under emotional circumstances,  
526 suggesting that, although memory is degraded under negative emotional contexts, participants  
527 can accurately account for this in their subjective confidence.

528 Our study is among the first to examine the impact of emotion on metacognition, in  
529 particular for metamemory. Previous investigations in the perceptual domain report that  
530 arousing stimuli “boost” the signal-to-noise ratio of visual motion, as reflected in both models  
531 of ballistic evidence accumulation, and subjective confidence (Allen et al., 2016; Lufityanto et  
532 al., 2016). In our study, the effect of arousal was generally muted or dependent on stimulus  
533 valence. One possible explanation for this difference is found in our validation rating study;  
534 while the valence dimension was well preserved, the distinction between high and low arousal  
535 stimuli was more muted. This limits the extent to which we can draw conclusions about  
536 stimulus arousal in our data; it may be that the stimuli were simply not sufficiently distinct for  
537 a Danish sample. Future studies would benefit from both a larger corpus of validated words, a  
538 more general sample of WEIRD and non-WEIRD participants, and multiple modalities of  
539 memorized stimuli which may better preserve arousal-based effects.

540 In a complementary line of research, several investigations have linked physiological  
541 arousal (e.g., as indexed by pupil dilation or cardiac acceleration) to subjective confidence and



542 metacognition. According to influential predictive-coding accounts of metacognition (Allen et  
543 al., 2016; Meyniel et al., 2015; Moulin & Souchay, 2015), confidence reflects the width of a  
544 posterior decision variable, such that fluctuations in arousal bias the gain or precision of this  
545 distribution. Accordingly, previous studies have shown that pharmacological blockade of  
546 arousal (e.g., via beta-blockers) improves metacognitive sensitivity, and numerous  
547 computational studies have linked fluctuations in arousal during a decision task to this form of  
548 adaptive gain control (Cheadle et al., 2014; Gilzenrat et al., 2010; Hauser et al., 2017; Urai et  
549 al., 2017).

550 Here, we examined both trial level evoked changes in cardiovascular arousal and summary  
551 measures of pulse rate variability separately for each condition. When examining instantaneous  
552 heart rate variation, we observed a robust sinusoidal pattern that remained stable across  
553 conditions, similar to an orientation reflex triggered by trial onset. This evoked response was  
554 characterized by an early increase of instantaneous heart rate of about 1 bpm that occurred 1-2  
555 seconds after stimuli presentation, followed by a latter deceleration of 2 bpm, occurring around  
556 4-6 seconds after stimuli presentation. Critically here, the early increase also overlaps with the  
557 interval within which participants made their type-I decision, while the deceleration overlaps  
558 with the metacognition estimation time window (see Figure 5), suggesting that this pattern  
559 reflects aspects of the cognitive processes variations. Indeed, replicating previous findings  
560 (Allen et al., 2016), we observed a robust correlation between trial-by-trial fluctuations in  
561 subjective confidence during this late interval, with the strength of this correlation being  
562 modulated by stimulus valence during the early, decision-evoked time period. These results  
563 suggest that at least some variance in the ability to monitor emotional inputs to metamemory  
564 may arise from monitoring correlated physiological changes when encoding and recognizing  
565 emotional stimuli. Future work may build on these results by modelling how physiological  
566 arousal alters the gain or precision of evidence accumulation during the recognition process,  
567 e.g., by using a hierarchical Bayesian model of decision time and confidence.

568 Whereas no overall modulation of instantaneous heart-rate was seen for stimulus valence or  
569 arousal, here we observed substantive, robust modulations of heart rate variability (HRV) when  
570 subjects recalled negatively valenced stimuli across multiple time, frequency and non-linear  
571 indices. HRV (i.e the amount of change across time of the interbeat interval) can reflect the  
572 influence of higher cognitive processes on cardiac frequency through the parasympathetic  
573 nervous system (Thayer & Lane, 2009). Across the different range of HRV indices we  
574 examined, two showed a strong valence main effect (i.e., Mean BPM & SD2), whereas others  
575 (i.e., high-frequency peak and pnn50) showed a robust interaction between these factors.  
576 Although disentangling what underlies these different effects is far from trivial, it is interesting  
577 to note the dissociation between these effects, and similarity to those observed for our type-I  
578 and type-II metamemory measures. One intriguing possibility is that the high-frequency  
579 variability indexed by the former two measures may be a more direct input for metacognitive  
580 monitoring than the others, as these showed a similar pattern of exaggerated valence effect with  
581 no effect of arousal. One means to probe this hypothesis is to correlate individual differences  
582 in the modulation of confidence by valence with each HRV metric; however, our study is  
583 underpowered for individual differences analyses (Schönbrodt & Perugini, 2013), leaving it as  
584 an intriguing avenue for future research.

585 Several important limitations should be considered when interpreting our HRV effects. As  
586 HRV is here calculated by collapsing across each 50 trial block, the modulations observed

587 therein are necessarily a mixture of multiple cognitive states and perceptual inputs; future  
588 studies could benefit from disentangling the encoding, perceptual, and retrieval stages to better  
589 account for these stages of the decision-process. Additionally, here we assessed heart rate  
590 variability through pulse oximetry recording. Pulse oximetry recordings are used as an  
591 alternative to the electrocardiogram (ECG) by several clinical and non-clinical studies  
592 (Quintana, Elstad, et al., 2016). The sampling rate of our device (75 Hz) is not optimal when  
593 compared to recommended standards for electrocardiogram (ECG) recording and HRV  
594 measurement (Quintana, Alvares, et al., 2016), which could limit our ability to detect true  
595 effects, particularly in the lower frequency range. Previous reports, however, have shown a  
596 strong consistency between the estimated pulse rate variability and the heart rate variability as  
597 measured through ECG (Lu et al., 2009; Schäfer & Vagedes, 2013). Similarly, we did not  
598 measure or control respiratory cycles during this study, which robustly modulate HRV  
599 measures, in particular in the lower frequency. Collectively, while our results nicely  
600 demonstrate that stimulus emotional content modulates high-frequency indices of  
601 cardiovascular arousal, future studies in this area are likely to benefit from a combination of  
602 more nuanced experimental design and a more sophisticated recording set-up.

## 603 **Conclusion**

604 This pre-registered study sheds light on the biasing effects of valence and arousal on  
605 metamemory, as well as possible physiological correlates of these effects. Salient negatively  
606 valenced stimuli globally decreased both memory performance and metacognition, supporting  
607 a role for emotions in guiding confidence and memory performance. Largely mirroring these  
608 effects, we found robust correlations of instantaneous heart-rate and confidence that were  
609 modulated by stimulus valence, and also show that multiple summary indices of cardiovascular  
610 reactivity were modulated by negative stimuli. Collectively, these results suggest that although  
611 negative stimuli do exert a degrading influence on recognition memory, participants are largely  
612 able to account for this effect in their subjective confidence, perhaps by monitoring  
613 physiological states.

614 What then of our imaginary court-room examples? While the results of this laboratory study  
615 are far from the real-world arena of courtroom testimony, our study offers a first look into how  
616 emotionally charged stimuli may bias both the ability to accurately recognize events and the  
617 metacognitive ability to monitor the accuracy of said recollections. Our advice for the  
618 presumptive trial lawyer then should be to not only attend to the emotional contents of memory  
619 as a possible source of bias, but also the level of subjective confidence expressed by a witness  
620 in such circumstances. However, we note that while our study provides an early look at these  
621 phenomena, substantive methodological limitations remain to be overcome in future research.  
622 In particular, a wider, more ecological variety of emotional stimuli, together with a more  
623 advanced repertoire of physiological measures, is likely to further illuminate the interaction of  
624 emotion, memory, and metacognition.

625  
626  
627

628

629

630 **Acknowledgements**

631 NL, CMCC, NKM, NN, and MA are supported by a Lundbeckfonden Fellowship (under Grant  
632 [R272-2017-4345]), and the AIAS-COFUND II fellowship programme that is supported by the  
633 Marie Skłodowska-Curie actions under the European Union's Horizon 2020 (under Grant  
634 [754513]), and the Aarhus University Research Foundation.

635

636 **ORCIDS:**

637 N. L. : 0000-0002-2651-4929

638 S. S. E. : 0000-0002-5348-6417

639 C. C. : 0000-0001-7663-5828

640 N. K. M. : 0000-0001-6580-5289

641

642 N. N. : 0000-0003-1226-1139

643

644 F. F. : 0000-0002-9974-6261

645 M. A. : 0000-0001-9399-4179

646

647 **Disclosure statement.** No financial interest or benefit that has arisen from the direct  
648 applications of this research.

649 **Data availability statement.**

650 The project pre-registration can be found at the following link: <https://osf.io/9awtb>

651 **Data deposition and supplemental online material.**

652 All behavioral and physiological data can be found at:

653 <https://github.com/emodied-computation-group/EmotionMetamemory>

654

655

656  
657  
658  
659  
660  
661  
662  
663  
664  
665  
666  
667  
668  
669  
670  
671  
672  
673  
674  
675  
676  
677  
678  
679  
680  
681  
682  
683  
684  
685  
686  
687  
688  
689  
690  
691  
692  
693  
694  
695  
696  
697  
698  
699

## References

- Abercrombie, H., Chambers, A., Greischar, L., & Monticelli, R. (2008). Orienting, emotion, and memory: Phasic and tonic variation in heart rate predicts memory for emotional pictures in men. *Neurobiol Learn Mem*, *90*, 644–650.
- Allen, M., Frank, D., Schwarzkopf, D. S., Fardo, F., Winston, J. S., Hauser, T. U., & Rees, G. (2016). Unexpected arousal modulates the influence of sensory noise on confidence. *ELife*, *5*. <https://doi.org/10.7554/elife.18103>
- Allen, M., Poggiali, D., Whitaker, K., Marshall, T. R., & Kievit, R. A. (2019). Raincloud plots: A multi-platform tool for robust data visualization. *Wellcome Open Research*, *4*, 63. <https://doi.org/10.12688/wellcomeopenres.15191.1>
- Bradley, M. M., & Lang, P. J. (1994). Measuring emotion: The self-assessment manikin and the semantic differential. *Journal of Behavior Therapy and Experimental Psychiatry*, *25*(1), 49–59. [https://doi.org/10.1016/0005-7916\(94\)90063-9](https://doi.org/10.1016/0005-7916(94)90063-9)
- Bradley, M. M., & Lang, P. J. (1999). *Affective Norms for English Words (ANEW): Instruction Manual and Affective Ratings*.
- Cahill, L., & McGaugh, J. L. (1998). Mechanisms of emotional arousal and lasting declarative memory. *Trends in Neurosciences*, *21*(7), 294–299. [https://doi.org/10.1016/S0166-2236\(97\)01214-9](https://doi.org/10.1016/S0166-2236(97)01214-9)
- Cheadle, S., Wyart, V., Tsetsos, K., Myers, N., de Gardelle, V., Hecce Castañón, S., & Summerfield, C. (2014). Adaptive Gain Control during Human Perceptual Choice. *Neuron*, *81*(6), 1429–1441. <https://doi.org/10.1016/j.neuron.2014.01.020>
- Chua, E. F., Pergolizzi, D., & Weintraub, R. R. (2014). The Cognitive Neuroscience of Metamemory Monitoring: Understanding Metamemory Processes, Subjective Levels Expressed, and Metacognitive Accuracy. In S. M. Fleming & C. D. Frith (Eds.), *The Cognitive Neuroscience of Metacognition* (pp. 267–291). Springer. [https://doi.org/10.1007/978-3-642-45190-4\\_12](https://doi.org/10.1007/978-3-642-45190-4_12)
- Critchley, H. D., Rotshtein, P., Nagai, Y., O’Doherty, J., Mathias, C. J., & Dolan, R. J. (2005). Activity in the human brain predicting differential heart rate responses to emotional facial expressions. *NeuroImage*, *24*(3), 751–762. <https://doi.org/10.1016/j.neuroimage.2004.10.013>
- Davis, R. L., & Zhong, Y. (2017). The Biology of Forgetting—A Perspective. *Neuron*, *95*(3), 490–503. <https://doi.org/10.1016/j.neuron.2017.05.039>
- De Martino, B., Fleming, S. M., Garrett, N., & Dolan, R. J. (2013). Confidence in value-based choice. *Nature Neuroscience*, *16*(1), 105–110. <https://doi.org/10.1038/nn.3279>
- Fleming, S. M. (2017). HMeta-d: Hierarchical Bayesian estimation of metacognitive efficiency from confidence ratings. *Neuroscience of Consciousness*, *2017*(1). <https://doi.org/10.1093/nc/nix007>
- Fleming, S. M., Dolan, R. J., & Frith, C. D. (2012). Metacognition: Computation, biology and function. *Philosophical Transactions of the Royal Society B: Biological Sciences*, *367*(1594), 1280–1286. <https://doi.org/10.1098/rstb.2012.0021>
- Fleming, S. M., & Lau, H. C. (2014). How to measure metacognition. *Frontiers in Human Neuroscience*, *8*. <https://doi.org/10.3389/fnhum.2014.00443>

- 700 Fleming, S. M., Maniscalco, B., Ko, Y., Amendi, N., Ro, T., & Lau, H. (2015). Action-Specific  
701 Disruption of Perceptual Confidence. *Psychological Science*, 26(1), 89–98.  
702 <https://doi.org/10.1177/0956797614557697>
- 703 Fleming, S. M., Ryu, J., Golfinos, J. G., & Blackmon, K. E. (2014). Domain-specific  
704 impairment in metacognitive accuracy following anterior prefrontal lesions. *Brain*,  
705 137(10), 2811–2822. <https://doi.org/10.1093/brain/awu221>
- 706 Gagnepain, P., Hulbert, J., & Anderson, M. C. (2017). Parallel Regulation of Memory and  
707 Emotion Supports the Suppression of Intrusive Memories. *The Journal of*  
708 *Neuroscience*, 37(27), 6423–6441. <https://doi.org/10.1523/JNEUROSCI.2732-16.2017>
- 709 Galvin, S. J., Podd, J. V., Drga, V., & Whitmore, J. (2003). Type 2 tasks in the theory of signal  
710 detectability: Discrimination between correct and incorrect decisions. *Psychonomic*  
711 *Bulletin & Review*, 10(4), 843–876. <https://doi.org/10.3758/BF03196546>
- 712 Gilzenrat, M. S., Nieuwenhuis, S., Jepma, M., & Cohen, J. D. (2010). Pupil diameter tracks  
713 changes in control state predicted by the adaptive gain theory of locus coeruleus  
714 function. *Cognitive, Affective, & Behavioral Neuroscience*, 10(2), 252–269.  
715 <https://doi.org/10.3758/CABN.10.2.252>
- 716 Gramfort, A. (2013). MEG and EEG data analysis with MNE-Python. *Frontiers in*  
717 *Neuroscience*, 7. <https://doi.org/10.3389/fnins.2013.00267>
- 718 Hauser, T. U., Allen, M., Purg, N., Moutoussis, M., Rees, G., & Dolan, R. J. (2017).  
719 Noradrenaline blockade specifically enhances metacognitive performance. *ELife*, 6,  
720 e24901. <https://doi.org/10.7554/eLife.24901>
- 721 Heyes, C., Bang, D., Shea, N., Frith, C. D., & Fleming, S. M. (2020). Knowing Ourselves  
722 Together: The Cultural Origins of Metacognition. *Trends in Cognitive Sciences*, 24(5),  
723 349–362. <https://doi.org/10.1016/j.tics.2020.02.007>
- 724 James, W. (1884). What is an emotion? *Mind*, 9(34), 188–205.  
725 <https://doi.org/10.1093/mind/os-ix.34.188>
- 726 JASP Team. (2020). *JASP (Version 0.12.2)[Computer software]*. <https://jasp-stats.org/>
- 727 Kensinger, E. A., & Corkin, S. (2004). Two routes to emotional memory: Distinct neural  
728 processes for valence and arousal. *Proceedings of the National Academy of Sciences*,  
729 101(9), 3310–3315. <https://doi.org/10.1073/pnas.0306408101>
- 730 Kreibig, S. D. (2010). Autonomic nervous system activity in emotion: A review. *Biological*  
731 *Psychology*, 84(3), 394–421. <https://doi.org/10.1016/j.biopsycho.2010.03.010>
- 732 Lau, H., & Rosenthal, D. (2011). Empirical support for higher-order theories of conscious  
733 awareness. *Trends in Cognitive Sciences*, 15(8), 365–373.  
734 <https://doi.org/10.1016/j.tics.2011.05.009>
- 735 Lee, A. L. F., Ruby, E., Giles, N., & Lau, H. (2018). Cross-Domain Association in  
736 Metacognitive Efficiency Depends on First-Order Task Types. *Frontiers in*  
737 *Psychology*, 9, 2464. <https://doi.org/10.3389/fpsyg.2018.02464>
- 738 Legrand, N., & Allen, M. (2020). *Embodied-computation-groupsystole Initial release* (Version  
739 0.1.0) [Computer software]. Zenodo. <https://doi.org/10.5281/zenodo.3610264>
- 740 Legrand, N., Etard, O., Vandavelde, A., Pierre, M., Viader, F., Clochon, P., Doidy, F.,  
741 Peschanski, D., Eustache, F., & Gagnepain, P. (2018). *Does the heart forget?*  
742 *Modulation of cardiac activity induced by inhibitory control over emotional memories.*  
743 <https://doi.org/10.1101/376954>

- 744 Lipponen, J. A., & Tarvainen, M. P. (2019). A robust algorithm for heart rate variability time  
745 series artefact correction using novel beat classification. *Journal of Medical*  
746 *Engineering & Technology*, 43(3), 173–181.  
747 <https://doi.org/10.1080/03091902.2019.1640306>
- 748 Lu, G., Yang, F., Taylor, J. A., & Stein, J. F. (2009). A comparison of photoplethysmography  
749 and ECG recording to analyse heart rate variability in healthy subjects. *Journal of*  
750 *Medical Engineering & Technology*, 33(8), 634–641.  
751 <https://doi.org/10.3109/03091900903150998>
- 752 Lufityanto, G., Donkin, C., & Pearson, J. (2016). Measuring Intuition: Nonconscious  
753 Emotional Information Boosts Decision Accuracy and Confidence. *Psychological*  
754 *Science*, 27(5), 622–634. <https://doi.org/10.1177/0956797616629403>
- 755 Macmillan, N. A., & Creelman, C. D. (2004). *Detection Theory: A User's Guide* (2nd ed.).  
756 Psychology Press. <https://doi.org/10.4324/9781410611147>
- 757 Maniscalco, B., & Lau, H. (2012). A signal detection theoretic approach for estimating  
758 metacognitive sensitivity from confidence ratings. *Consciousness and Cognition*,  
759 21(1), 422–430. <https://doi.org/10.1016/j.concog.2011.09.021>
- 760 Mazancieux, A., Fleming, S. M., Souchay, C., & Moulin, C. J. A. (2020). Is there a G factor  
761 for metacognition? Correlations in retrospective metacognitive sensitivity across tasks.  
762 *Journal of Experimental Psychology: General*. <https://doi.org/10.1037/xge0000746>
- 763 McCurdy, L. Y., Maniscalco, B., Metcalfe, J., Liu, K. Y., de Lange, F. P., & Lau, H. (2013).  
764 Anatomical Coupling between Distinct Metacognitive Systems for Memory and Visual  
765 Perception. *Journal of Neuroscience*, 33(5), 1897–1906.  
766 <https://doi.org/10.1523/JNEUROSCI.1890-12.2013>
- 767 Meyniel, F., Sigman, M., & Mainen, Z. F. (2015). Confidence as Bayesian Probability: From  
768 Neural Origins to Behavior. *Neuron*, 88(1), 78–92.  
769 <https://doi.org/10.1016/j.neuron.2015.09.039>
- 770 Montefinese, M., Ambrosini, E., Fairfield, B., & Mammarella, N. (2014). The adaptation of  
771 the Affective Norms for English Words (ANEW) for Italian. *Behavior Research*  
772 *Methods*, 46(3), 887–903. <https://doi.org/10.3758/s13428-013-0405-3>
- 773 Moors, A., De Houwer, J., Hermans, D., Wanmaker, S., van Schie, K., Van Harmelen, A.-L.,  
774 De Schryver, M., De Winne, J., & Brysbaert, M. (2013). Norms of valence, arousal,  
775 dominance, and age of acquisition for 4,300 Dutch words. *Behavior Research Methods*,  
776 45(1), 169–177. <https://doi.org/10.3758/s13428-012-0243-8>
- 777 Morales, J., Lau, H., & Fleming, S. M. (2018). Domain-General and Domain-Specific Patterns  
778 of Activity Supporting Metacognition in Human Prefrontal Cortex. *The Journal of*  
779 *Neuroscience*, 38(14), 3534–3546. <https://doi.org/10.1523/JNEUROSCI.2360-17.2018>
- 780 Moulin, C., & Souchay, C. (2015). An active inference and epistemic value view of  
781 metacognition. *Cognitive Neuroscience*, 6(4), 221–222.  
782 <https://doi.org/10.1080/17588928.2015.1051015>
- 783 Ochsner, K. N. (2000). Are affective events richly recollected or simply familiar? The  
784 experience and process of recognizing feelings past. *Journal of Experimental*  
785 *Psychology: General*, 129(2), 242–261. <https://doi.org/10.1037/0096-3445.129.2.242>
- 786 Otgaar, H., Howe, M. L., Patihis, L., Merckelbach, H., Lynn, S. J., Lilienfeld, S. O., & Loftus,  
787 E. F. (2019). The Return of the Repressed: The Persistent and Problematic Claims of

- 788 Long-Forgotten Trauma. *Perspectives on Psychological Science*, 14(6), 1072–1095.  
789 <https://doi.org/10.1177/1745691619862306>
- 790 Peirce, J., Gray, J. R., Simpson, S., MacAskill, M., Höchenberger, R., Sogo, H., Kastman, E.,  
791 & Lindeløv, J. K. (2019). PsychoPy2: Experiments in behavior made easy. *Behavior*  
792 *Research Methods*, 51(1), 195–203. <https://doi.org/10.3758/s13428-018-01193-y>
- 793 Quintana, D. S., Alvares, G. A., & Heathers, J. A. J. (2016). Guidelines for Reporting Articles  
794 on Psychiatry and Heart rate variability (GRAPH): Recommendations to advance  
795 research communication. *Translational Psychiatry*, 6(5), e803–e803.  
796 <https://doi.org/10.1038/tp.2016.73>
- 797 Quintana, D. S., Elstad, M., Kaufmann, T., Brandt, C. L., Haatveit, B., Haram, M., Nerhus, M.,  
798 Westlye, L. T., & Andreassen, O. A. (2016). Resting-state high-frequency heart rate  
799 variability is related to respiratory frequency in individuals with severe mental illness  
800 but not healthy controls. *Scientific Reports*, 6(1), 37212.  
801 <https://doi.org/10.1038/srep37212>
- 802 Redondo, J., Fraga, I., Padrón, I., & Comesaña, M. (2007). The Spanish adaptation of ANEW  
803 (Affective Norms for English Words). *Behavior Research Methods*, 39(3), 600–605.  
804 <https://doi.org/10.3758/BF03193031>
- 805 Reggev, N., Zuckerman, M., & Maril, A. (2011). Are all judgments created equal?: An fMRI  
806 study of semantic and episodic metamemory predictions. *Neuropsychologia*, 49(5),  
807 1332–1342. <https://doi.org/10.1016/j.neuropsychologia.2011.01.013>
- 808 Rollwage, M., Loosen, A., Hauser, T. U., Moran, R., Dolan, R. J., & Fleming, S. M. (2020).  
809 Confidence drives a neural confirmation bias. *Nature Communications*, 11(1), 2634.  
810 <https://doi.org/10.1038/s41467-020-16278-6>
- 811 Rouder, J. N., Morey, R. D., Speckman, P. L., & Province, J. M. (2012). Default Bayes factors  
812 for ANOVA designs. *Journal of Mathematical Psychology*, 56(5), 356–374.  
813 <https://doi.org/10.1016/j.jmp.2012.08.001>
- 814 Schäfer, A., & Vagedes, J. (2013). How accurate is pulse rate variability as an estimate of heart  
815 rate variability? *International Journal of Cardiology*, 166(1), 15–29.  
816 <https://doi.org/10.1016/j.ijcard.2012.03.119>
- 817 Schönbrodt, F. D., & Perugini, M. (2013). At what sample size do correlations stabilize?  
818 *Journal of Research in Personality*, 47(5), 609–612.  
819 <https://doi.org/10.1016/j.jrp.2013.05.009>
- 820 Shaffer, F., & Ginsberg, J. P. (2017). An Overview of Heart Rate Variability Metrics and  
821 Norms. *Frontiers in Public Health*, 5, 258. <https://doi.org/10.3389/fpubh.2017.00258>
- 822 Shaffer, F., McCraty, R., & Zerr, C. L. (2014). A healthy heart is not a metronome: An  
823 integrative review of the heart’s anatomy and heart rate variability. *Frontiers in*  
824 *Psychology*, 5. <https://doi.org/10.3389/fpsyg.2014.01040>
- 825 Shea, N., Boldt, A., Bang, D., Yeung, N., Heyes, C., & Frith, C. D. (2014). Supra-personal  
826 cognitive control and metacognition. *Trends in Cognitive Sciences*, 18(4), 186–193.  
827 <https://doi.org/10.1016/j.tics.2014.01.006>
- 828 Shields, G. S., Sazma, M. A., McCullough, A. M., & Yonelinas, A. P. (2017). The effects of  
829 acute stress on episodic memory: A meta-analysis and integrative review.  
830 *Psychological Bulletin*, 143(6), 636–675. <https://doi.org/10.1037/bul0000100>

- 831 Tauber, S. K., & Dunlosky, J. (2012). Can older adults accurately judge their learning of  
832 emotional information? *Psychology and Aging*, 27(4), 924–933.  
833 <https://doi.org/10.1037/a0028447>
- 834 Thayer, J. F., & Lane, R. D. (2009). Claude Bernard and the heart-brain connection: Further  
835 elaboration of a model of neurovisceral integration. *Neuroscience and Biobehavioral*  
836 *Reviews*, 33(2), 81–88. <https://doi.org/10.1016/j.neubiorev.2008.08.004>
- 837 Urai, A. E., Braun, A., & Donner, T. H. (2017). Pupil-linked arousal is driven by decision  
838 uncertainty and alters serial choice bias. *Nature Communications*, 8(1), 14637.  
839 <https://doi.org/10.1038/ncomms14637>
- 840 Vallat, R. (2018). Pingouin: Statistics in Python. *Journal of Open Source Software*, 3(31),  
841 1026. <https://doi.org/10.21105/joss.01026>
- 842 van Gent, P., Farah, H., van Nes, N., & van Arem, B. (2019). Analysing Noisy Driver  
843 Physiology Real-Time Using Off-the-Shelf Sensors: Heart Rate Analysis Software  
844 from the Taking the Fast Lane Project. *Journal of Open Research Software*, 7, 32.  
845 <https://doi.org/10.5334/jors.241>
- 846 Yeung, N., & Summerfield, C. (2012). Metacognition in human decision-making: Confidence  
847 and error monitoring. *Philosophical Transactions of the Royal Society B: Biological*  
848 *Sciences*, 367(1594), 1310–1321. <https://doi.org/10.1098/rstb.2011.0416>
- 849 Yonelinas, A. P., & Ritchey, M. (2015). The slow forgetting of emotional episodic memories:  
850 An emotional binding account. *Trends in Cognitive Sciences*, 19(5), 259–267.  
851 <https://doi.org/10.1016/j.tics.2015.02.009>
- 852 Zimmerman, C. A., & Kelley, C. M. (2010). “I’ll remember this!” Effects of emotionality on  
853 memory predictions versus memory performance. *Journal of Memory and Language*,  
854 62(3), 240–253. <https://doi.org/10.1016/j.jml.2009.11.004>
- 855
